# Supplementary material for: Human visual gamma for color stimuli
Source: eLife. 2022 May 9;11:e75897. doi: 10.7554/eLife.75897 (PMC9122493; doi:10.7554/eLife.75897)
Supplement: Figure 1—source data 1. — DKL- (relative to gray background), CIELAB- (relative to standard illuminant D65), and cone-contrast coordinates of the stimuli and the background shown in this study. [file elife-75897-fig1-data1.xlsx]

## Sheet: Sheet1
Color label	L+M	L-M	S-(L+M)	L*	a*	b*	L	M	S
Background	0	0	0	69.4695	0	0	497.814	438.603	245.898
Red	-0.00772388	0.548709	0.00290076	68.5475	38.3352	-1.03501	573.172	361.231	245.941
Red-Blue	-0.00148338	0.384762	0.847585	68.5739	41.4725	-26.561	551.201	384.829	412.756
Blue	-0.0015348	0.000249879	1.19526	69.0622	21.8593	-34.5102	497.636	438.38	481.239
Green-Blue	-0.00220122	-0.387991	0.840426	69.7757	-13.6402	-24.8617	443.467	492.376	411.297
Green	0.00772388	-0.548709	-0.00290076	70.3721	-46.2368	1.00558	422.456	515.974	245.855
Green-Yellow	0.00148338	-0.384762	-0.847585	70.3468	-51.2073	40.3558	444.427	492.376	79.039
Yellow	0.0015348	-0.000249879	-1.19526	69.873	-24.315	71.2211	497.992	438.825	10.557
Red-Yellow	0.00220122	0.387991	-0.840426	69.1611	12.8766	39.2625	552.162	384.829	80.499
