# Supplementary figures and images for: Human visual gamma for color stimuli
Source: eLife journal article supplement (doi:10.7554/elife.75897), 2022-05-09

**A**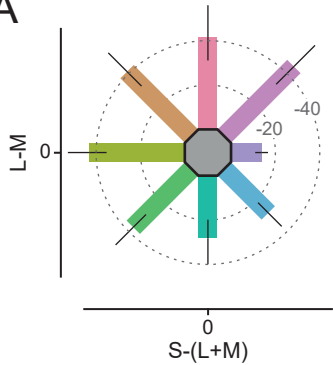**B**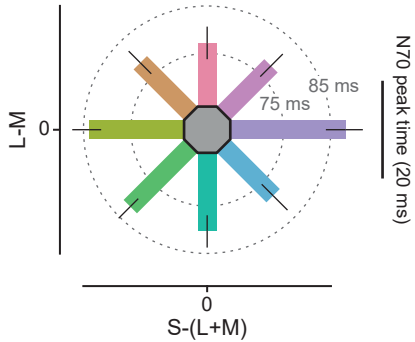**C**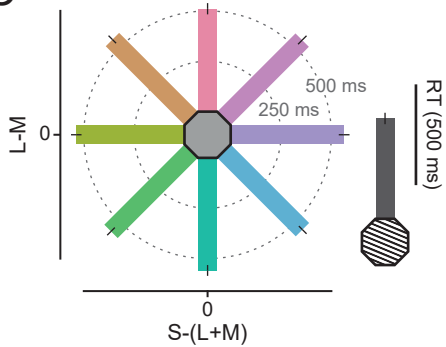

Supplement: supp [file elife-75897-supp-v1.zip]

**A****1st Peak**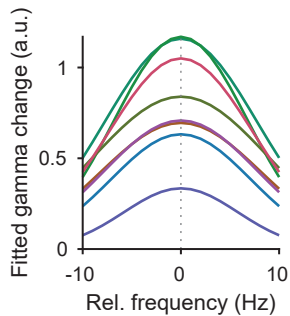**B****1st Peak**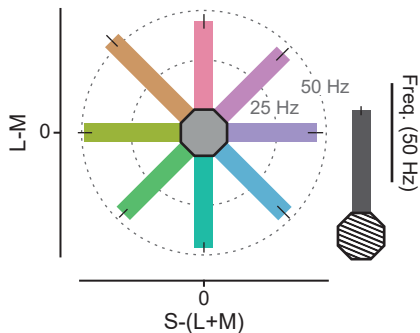**C****2nd Peak**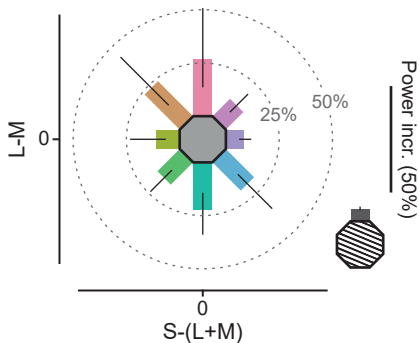**D****2nd Peak**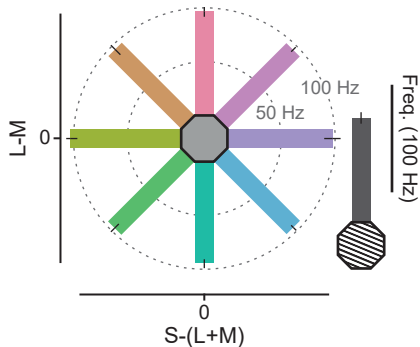

Supplement: supp [file elife-75897-supp-v1.zip]

**A**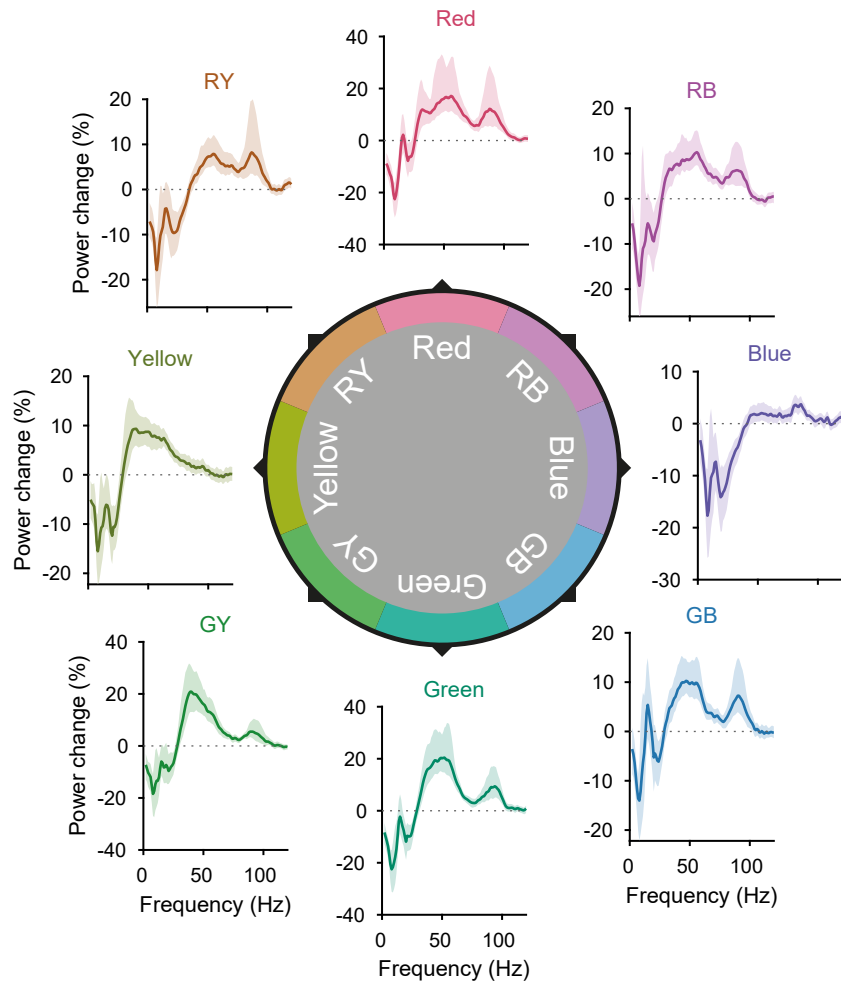**B**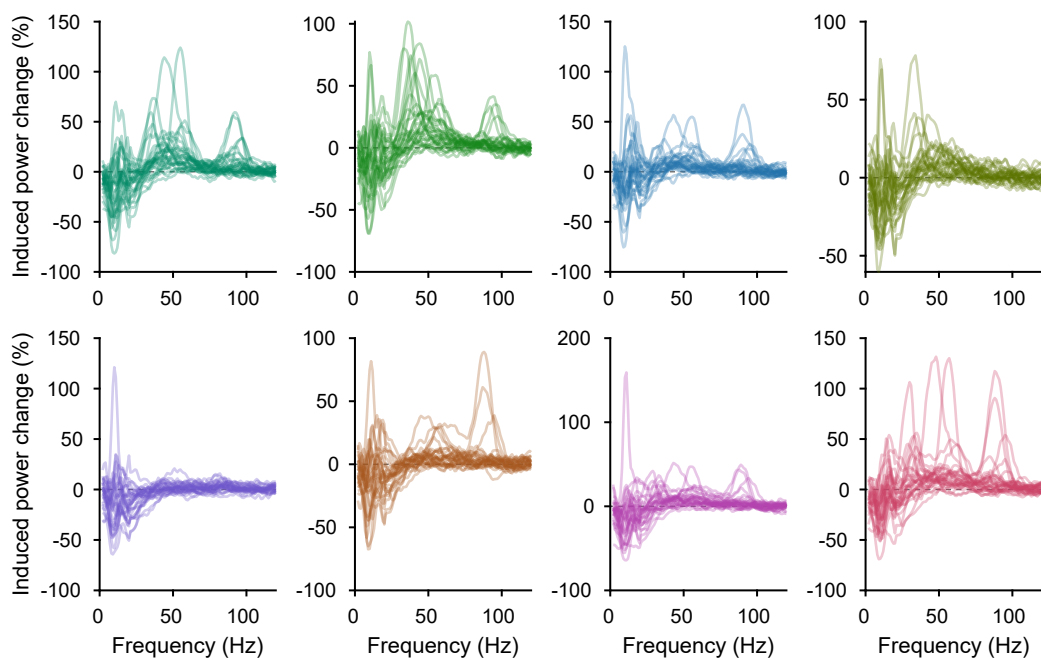

Supplement: supp [file elife-75897-supp-v1.zip]

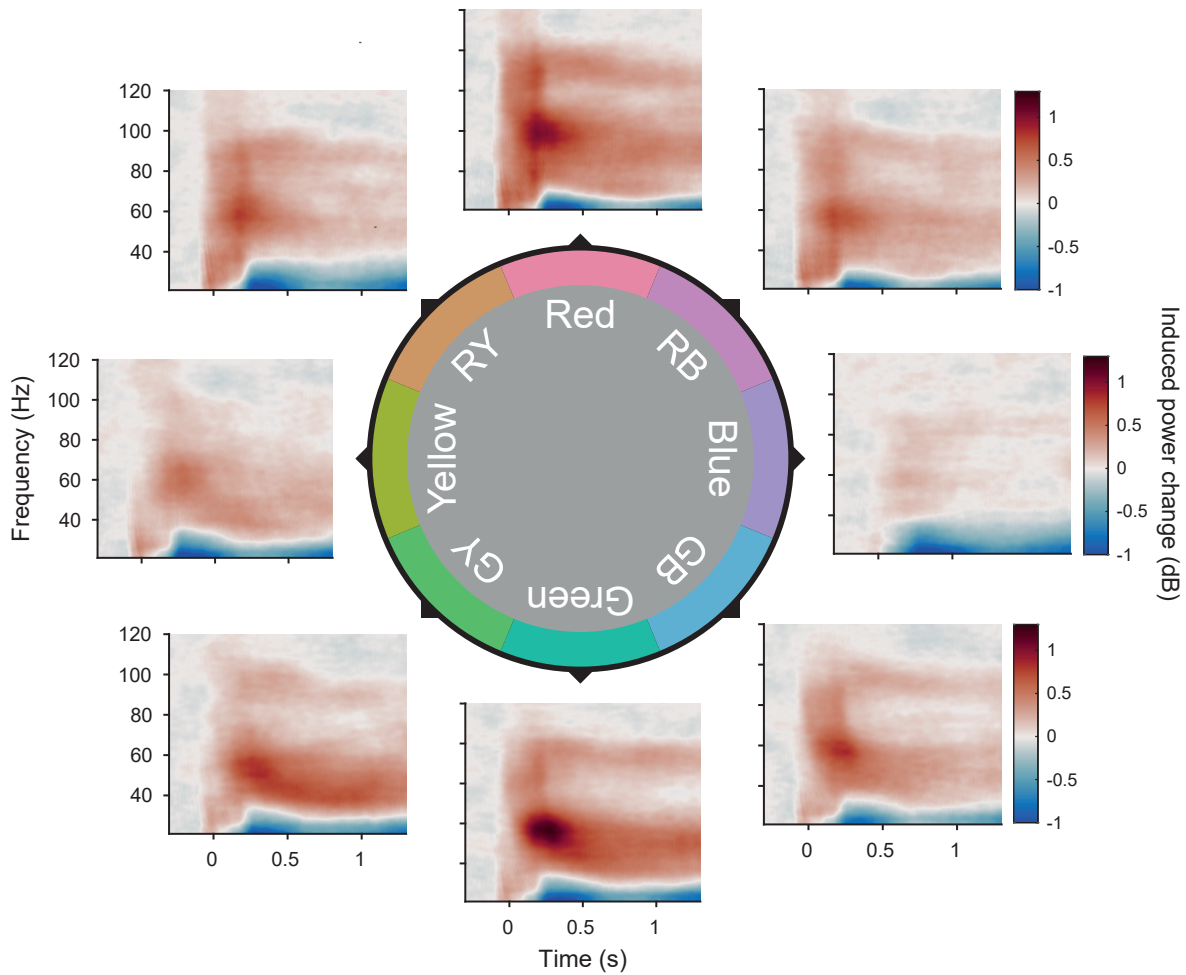

Supplement: supp [file elife-75897-supp-v1.zip]
